# Supplementary material
Source: HighWire-hosted journal article supplement (http://www.qdcxjkg.com/highwire/filestream/113746/field_highwire_adjunct_files/0/erj01008-2011_online_supplementary_tables.pdf)
Supplement: erj01008-2011_online_supplementary_tables.pdf [file erj01008-2011_online_supplementary_tables.pdf]

Table S1. Characteristics of included and excluded patients in COREA cohort.

|                                       | <b>Included (n=724)</b> | <b>Excluded</b>     | <b>P value</b> |
|---------------------------------------|-------------------------|---------------------|----------------|
| Age at onset, yr                      | 36.3±15.7               | 42.2±16.8 (n=640)   | 0.001          |
| Body mass index (kg·m <sup>-2</sup> ) | 23.81±3.28              | 24.07±3.40 (n=636)  | 0.158          |
| Smoking (pack-years)                  | 5.8±9.8                 | 6.9±11.6 (n=510)    | 0.046          |
| Atopy, % positive                     | 44.8                    | 52.6 (n=315)        | 0.479          |
| PostBD FEV <sub>1</sub> (%)           | 83.45±19.95             | 82.46±22.16 (n=616) | 0.401          |

Comparison between study groups is based on independent T-test for continuous variables and a  $\chi^2$  test for proportions. Data indicate means  $\pm$  SDs.

Table S2. Characteristics of included and excluded patients in SCH cohort.

|                                       | <b>Included (n=1843)</b> | <b>Excluded (n=349)</b> | <b>P value</b> |
|---------------------------------------|--------------------------|-------------------------|----------------|
| Age at onset, yr                      | 38.2±17.3                | 39.9±17.3 (n=349)       | 0.096          |
| Body mass index (kg·m <sup>-2</sup> ) | 24.22±3.52               | 24.54±3.91 (n=320)      | 0.134          |
| Smoking (pack-years)                  | 7.40±13.7                | 13.2±19.5 (n=54)        | <0.001         |
| Atopy, % positive                     | 59.4                     | 60.6 (n=315)            | 0.709          |
| PostBD FEV <sub>1</sub> (%)           | 79.86±22.42              | 79.37±22.14 (n=344)     | 0.711          |

Comparison between study groups is based on independent T-test for continuous variables and a  $\chi^2$  test for proportions. Data indicate means  $\pm$  SDs.
